# Supplementary material for: Comparative genomic analysis of the gut bacterium Bifidobacterium longum reveals loci susceptible to deletion during pure culture growth
Source: Springer Nature journal article supplement (doi:10.1186/1471-2164-9-247), 2008-05-27
Supplement: Additional file 1 [file 1471-2164-9-247-s1.pdf]

| Amino acid | Codon                  | Non-prophage genes |             | Prophage genes |             |
|------------|------------------------|--------------------|-------------|----------------|-------------|
|            |                        | Number             | Frequency   | Number         | Frequency   |
| Serine     | UCU                    | 2416               | 0.35        | 20             | 0.18        |
|            | <b>UCC<sup>a</sup></b> | <b>16802</b>       | <b>2.45</b> | 169            | 1.53        |
|            | UCA                    | 2277               | 0.33        | 33             | 0.30        |
|            | UCG                    | 9031               | 1.32        | 97             | 0.88        |
|            | AGU                    | 1837               | 0.27        | 19             | 0.17        |
|            | <b>AGC<sup>b</sup></b> | 8769               | 1.28        | <b>324</b>     | <b>2.94</b> |

<sup>a</sup>, bold indicates the most frequent codon; <sup>b</sup>, AGC is compatible to the extra tRNA\_Ser in the prophage genome.
