# Supplementary material for: Comparative genomic analysis of the gut bacterium Bifidobacterium longum reveals loci susceptible to deletion during pure culture growth
Source: Springer Nature journal article supplement (doi:10.1186/1471-2164-9-247), 2008-05-27

**A**

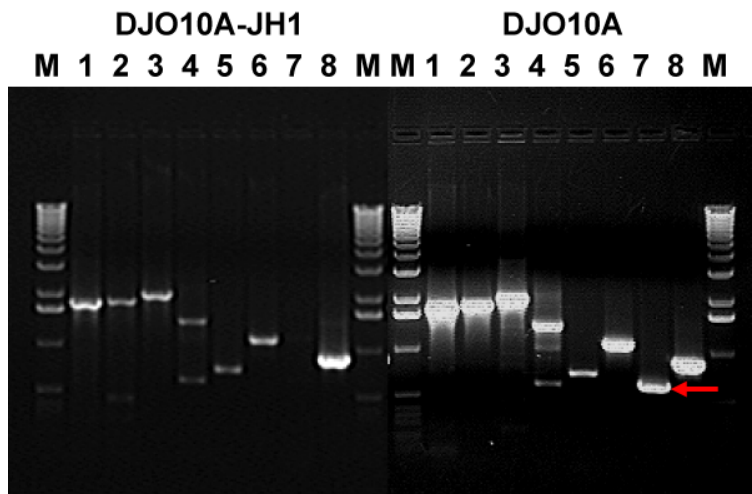

**B**

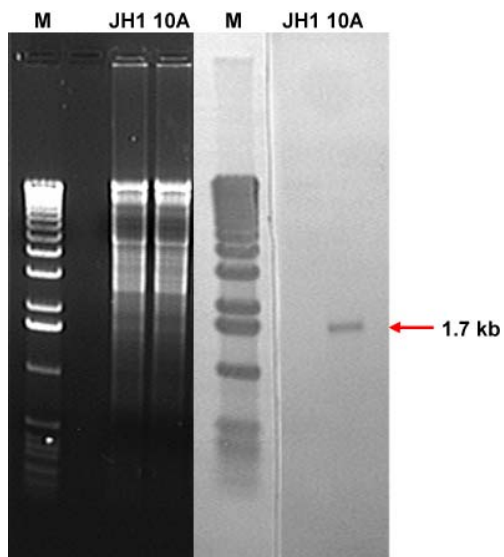

Supplement: Additional file 11 [file 1471-2164-9-247-s11.pdf]
