# Supplementary material for: Comparative genomic analysis of the gut bacterium Bifidobacterium longum reveals loci susceptible to deletion during pure culture growth
Source: Springer Nature journal article supplement (doi:10.1186/1471-2164-9-247), 2008-05-27

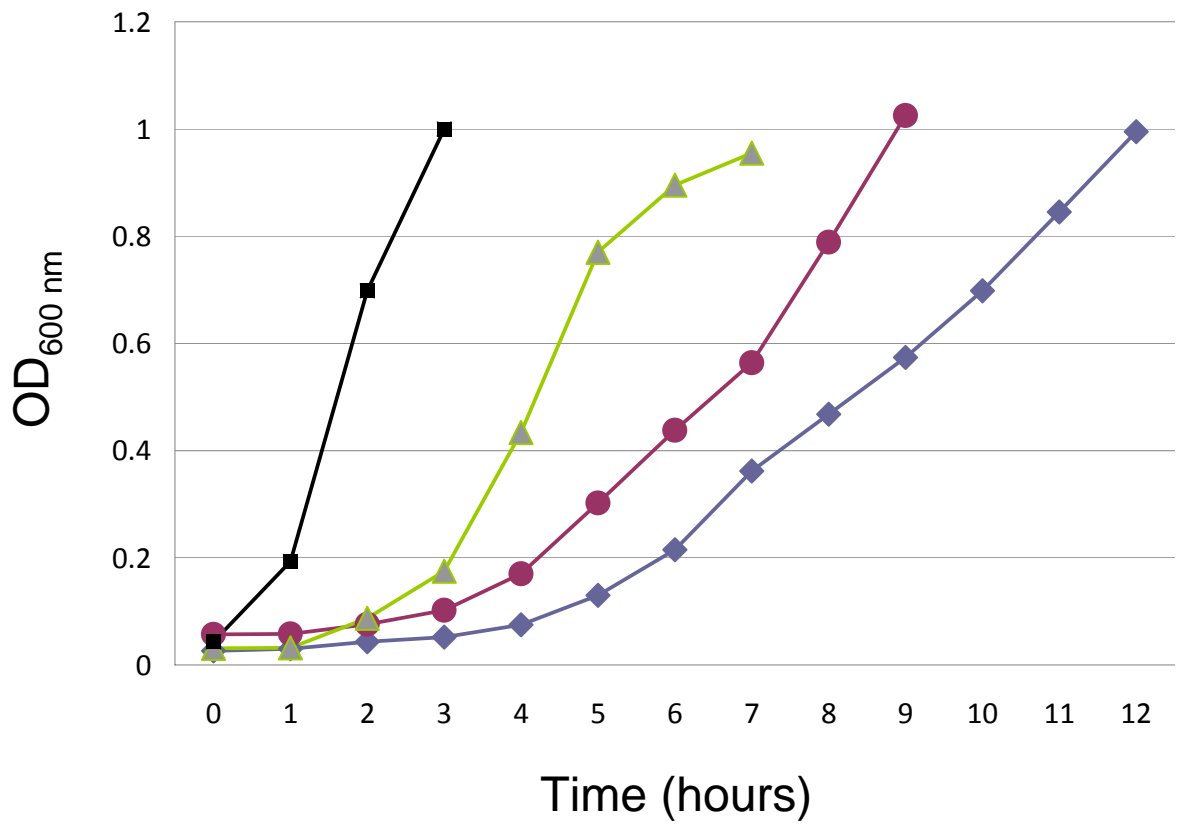

Supplement: Additional file 12 [file 1471-2164-9-247-s12.pdf]
