# Supplementary material for: Comparative genomic analysis of the gut bacterium Bifidobacterium longum reveals loci susceptible to deletion during pure culture growth
Source: Springer Nature journal article supplement (doi:10.1186/1471-2164-9-247), 2008-05-27
Supplement: Additional file 13 [file 1471-2164-9-247-s13.pdf]

| Target region                         | Primer    | Sequence <sup>b</sup>        | Size     | Reference           |
|---------------------------------------|-----------|------------------------------|----------|---------------------|
| <b>Unique region no.<sup>a</sup></b>  |           |                              |          |                     |
| Oligo cluster                         |           |                              |          |                     |
| 15                                    | OLIGO15-F | 5'-GAAATCCCGAAANACNACC-3'    | 1,793 bp | This study          |
|                                       | OLIGO15-R | 5'-GTTGCCGATGTTYTGNC-3'      |          |                     |
| 6                                     | OLIGO6-F  | 5'-GTATGTGATGAGCGGNAGY-3'    | 1,840 bp | This study          |
|                                       | OLIGO6-R  | 5'-ACCAACGGATTTYTGNGG-3'     |          |                     |
| 9                                     | OLIGO9-F  | 5'-AAGTTCACCGATGARACN-3'     | 2,001 bp | This study          |
|                                       | OLIGO9-R  | 5'-GTAACGCAACGARTAYTCC-3'    |          |                     |
| 11                                    | OLIGO11-F | 5'-TCCCCAACTACATTATHGTNG-3'  | 1,419 bp | This study          |
|                                       | OLIGO11-R | 5'-TCAACACCATCNGCNACC-3'     |          |                     |
| Arsenic cluster                       |           |                              |          |                     |
| 5                                     | ARS5-F    | 5'-ATTGGCTTATTGCTNACN-3'     | 736 bp   | This study          |
|                                       | ARS5-R    | 5'-GACTGCTTCAACTGNAGDATCC-3' |          |                     |
| 7                                     | ARS7-F    | 5'-ACAGTCCCAATACAGTAARACN-3' | 1,125 bp | This study          |
|                                       | ARS7-R    | 5'-CTCAAAGAAATTAGANGCNCC-3'  |          |                     |
| Lantibiotic                           |           |                              |          |                     |
| 12                                    | LANT-F    | 5'-CGCTATTACACCAGATACG-3'    | 646 bp   | This study          |
|                                       | LANT-R    | 5'-GGTAGACATACAGGTTCTCC-3'   |          |                     |
| Positive control<br>(16S rRNA gene)   |           |                              |          |                     |
|                                       | 16S-F     | 5'-CAGCWGCCGCGGTAATWC-3'     | 890 bp   | (Lane et al., 1985) |
|                                       | 16S-R     | 5'-ACGGGCGGTGTGTRC-3'        |          |                     |
| <b>Deletion of lantibiotic operon</b> |           |                              |          |                     |
| Forward                               | F3        | 5'-ATCCAACGAGCAAGAACC-3'     |          | This study          |
| Reverse                               | R3        | 5'-GTGAAATCACCCTACCACC-3'    |          |                     |
| <b>Deletion of MIC III region</b>     |           |                              |          |                     |
| Upstream                              | MIC-F1    | 5'-CACATCTTGGAAGCTTGG-3'     |          | This study          |
|                                       | MIC-R1    | 5'-CGTACACCGATGAATGACC-3'    |          |                     |
| Downstream                            | MIC-F2    | 5'-GTTCTTCGTCACCTCCACC-3'    |          |                     |
|                                       | MIC-R2    | 5'-AGTAATGTCCCGAATCTCC-3'    |          |                     |
| <b>IS elements</b>                    |           |                              |          |                     |
| IS30                                  | IS30-F    | 5'-GACAAACCCAAGACCCTCC-3'    | 352 bp   | This study          |
|                                       | IS30-R    | 5'-CGTGCATATCCCCATTATCC-3'   |          |                     |
| IS21                                  | IS21-F    | 5'-GCCCAAGTACAGTCTATCC-3'    | 681 bp   | This study          |
|                                       | IS21-R    | 5'-CAGAACGAACAATCGAACC-3'    |          |                     |
| IS256                                 | IS256-F   | 5'-TGTCACAGCAGATTCTACAGG-3'  | 719 bp   | This study          |
|                                       | IS256-R   | 5'-CAGCAATTCGTTACAGC-3'      |          |                     |
| ISL3                                  | ISL3-F    | 5'-CGAGATCGTCGAGCTTCC-3'     | 169 bp   | This study          |
|                                       | ISL3-R    | 5'-ATCAGGGCGATGAGGTTGG-3'    |          |                     |

<sup>a</sup>, as defined in the text ; <sup>b</sup>, Y (C/T), R (A/G), H (A/C/T), D (A/G/T), N (A/T/G/C), W (A/T)

### Additional reference

Lane, D.J., Pace, B., Olsen, G.J., Stahl, D.A., Sogin, M.L., and Pace, N.R. 1985. Rapid determination of 16S ribosomal RNA sequences for phylogenetic analyses. *Proc. Natl. Acad. Sci. USA* **82**: 6955-6959.
